# Supplementary material
Source: publisher figshare collection journal article supplement (https://sage.figshare.com/ndownloader/files/14841134)
Supplement: Supplementary file 1 [file 14841134]

**Supplementary S1: PRISMA Checklist**

| **Section/topic** | **#** | **Checklist item** | **Reported on page #** |
| --- | --- | --- | --- |
| **TITLE** | | |  |
| Title | 1 | Identify the report as a systematic review, meta-analysis, or both. | Page 1 |
| **ABSTRACT** | | |  |
| Structured summary | 2 | Provide a structured summary including, as applicable: background; objectives; data sources; study eligibility criteria, participants, and interventions; study appraisal and synthesis methods; results; limitations; conclusions and implications of key findings; systematic review registration number. | Page 2 |
| **INTRODUCTION** | | |  |
| Rationale | 3 | Describe the rationale for the review in the context of what is already known. | Pages 3 & 4 |
| Objectives | 4 | Provide an explicit statement of questions being addressed with reference to participants, interventions, comparisons, outcomes, and study design (PICOS). | Page 4 |
| **METHODS** | | |  |
| Protocol and registration | 5 | Indicate if a review protocol exists, if and where it can be accessed (e.g., Web address), and, if available, provide registration information including registration number. | N/A  Page 5 |
| Eligibility criteria | 6 | Specify study characteristics (e.g., PICOS, length of follow-up) and report characteristics (e.g., years considered, language, publication status) used as criteria for eligibility, giving rationale. | Page 5 |
| Information sources | 7 | Describe all information sources (e.g., databases with dates of coverage, contact with study authors to identify additional studies) in the search and date last searched. | Page 5 |
| Search | 8 | Present full electronic search strategy for at least one database, including any limits used, such that it could be repeated. | Page 5 |
| Study selection | 9 | State the process for selecting studies (i.e., screening, eligibility, included in systematic review, and, if applicable, included in the meta-analysis). | Page 6 |
| Data collection process | 10 | Describe method of data extraction from reports (e.g., piloted forms, independently, in duplicate) and any processes for obtaining and confirming data from investigators. | Page 6 |
| Data items | 11 | List and define all variables for which data were sought (e.g., PICOS, funding sources) and any assumptions and simplifications made. | Page 6 & |
|  | 12 | Describe methods used for assessing risk of bias of individual studies (including specification of whether this was done at the study or outcome level), and how this information is to be used in any data synthesis. | Page 6 |
| Summary measures | 13 | State the principal summary measures (e.g., risk ratio, difference in means). | Page 6 |
| Synthesis of results | 14 | Describe the methods of handling data and combining results of studies, if done, including measures of consistency (e.g., I2) for each meta-analysis. | Page 6 |

Page 1 of 2

| **Section/topic** | **#** | **Checklist item** | **Reported on page #** |
| --- | --- | --- | --- |
| Risk of bias across studies | 15 | Specify any assessment of risk of bias that may affect the cumulative evidence (e.g., publication bias, selective reporting within studies). | Page 6 |
| Additional analyses | 16 | Describe methods of additional analyses (e.g., sensitivity or subgroup analyses, meta-regression), if done, indicating which were pre-specified. | Page 6 |
| **RESULTS** | | |  |
| Study selection | 17 | Give numbers of studies screened, assessed for eligibility, and included in the review, with reasons for exclusions at each stage, ideally with a flow diagram. | Page 7& table 1 |
| Study characteristics | 18 | For each study, present characteristics for which data were extracted (e.g., study size, PICOS, follow-up period) and provide the citations. | Page 7 |
| Risk of bias within studies | 19 | Present data on risk of bias of each study and, if available, any outcome level assessment (see item 12). | Page 8 & figure 2 |
| Results of individual studies | 20 | For all outcomes considered (benefits or harms), present, for each study: (a) simple summary data for each intervention group (b) effect estimates and confidence intervals, ideally with a forest plot. | Pages 8 & 9, and tables 1& supplementary s2 |
| Synthesis of results | 21 | Present results of each meta-analysis done, including confidence intervals and measures of consistency. | Pages 8 & 9 |
| Risk of bias across studies | 22 | Present results of any assessment of risk of bias across studies (see Item 15). | Page 8 |
| Additional analysis | 23 | Give results of additional analyses, if done (e.g., sensitivity or subgroup analyses, meta-regression [see Item 16]). | Page 9 & tables S3-6]. |
| **DISCUSSION** | | |  |
| Summary of evidence | 24 | Summarize the main findings including the strength of evidence for each main outcome; consider their relevance to key groups (e.g., healthcare providers, users, and policy makers). | Page 10 |
| Limitations | 25 | Discuss limitations at study and outcome level (e.g., risk of bias), and at review-level (e.g., incomplete retrieval of identified research, reporting bias). | Pages 10 &11 |
| Conclusions | 26 | Provide a general interpretation of the results in the context of other evidence, and implications for future research. | Page11 |
| **FUNDING** | | |  |
| Funding | 27 | Describe sources of funding for the systematic review and other support (e.g., supply of data); role of funders for the systematic review. | Page 12 |

*From:*  Moher D, Liberati A, Tetzlaff J, Altman DG, The PRISMA Group (2009). Preferred Reporting Items for Systematic Reviews and Meta-Analyses: The PRISMA Statement. PLoS Med 6(7): e1000097. doi:10.1371/journal.pmed1000097

For more information, visit: **www.prisma-statement.org**

**Supplementary S2: Additional information on studies**

| **Study** | **Study location** | | **Participants details** | | **Duration** | | | **Functioning was primary study outcome/Analyses** | | | **Industry sponsor/ Trial number** | |
| --- | --- | --- | --- | --- | --- | --- | --- | --- | --- | --- | --- | --- |
| Alphs et al., (2015) | Multi-center: US Centers | | Mean age= 38.1(±10·5) years; Diagnosis=Schizophrenia;  Outpatients | | 65 weeks | | | No  ITT | | | Yes  NCT01157351 | |
| Ascher-Svanum et al., (2014) | Multi-center: International | | Mean age= 40.9(±10.9) years;  Diagnosis: Schizophrenia;  Outpatients | | 104 weeks | | | No  ITT | | | Yes  NCT00320489 | |
| Bai, et al., (2006)  Berwaerts et al.,  (2015) | | Single center:  Taiwan  Multi-center: International | | Mean age: 44.7(± 9.2) years;  Diagnosis: Schizophrenia:  out-patients  Mean age: 37.8(±11.0) years  Diagnosis: Schizophrenia;  Inpatient or out-patients | | 12 weeks  60 weeks | | | Yes  ITT  No  ITT | | | Yes NCS932314B480002  Yes  NCT01529515 |
| Buckley et al., (2015) | Multi-center: US centers | | Mean age= 38·2(±12·1) years; Diagnosis: Schizoaffective or Schizophrenia; inpatients or outpatients | | 130 weeks | | | No  ITT | | | No  NCT00330863 | |
| Fleischhacker et al.,  (2014) 2RCTs | Multi-center: International | | 1Mean age=41·2(±10·4) years  2Mean age =40.6(10.8) years  Diagnosis: Schizophrenia outpatients | | 138 weeks  252 weeks | | | No  ITT | | | Yes  1NCT00706654  2NCT00705783 | |
|  |  | |  | |  | | |  | | |  | |
| Fu et al., (2015) | Multi-center: international | | Mean age =38·6 (nr) years; Diagnosis: Schizoaffective; inpatients or outpatients | | 65 weeks | | | No  ITT | | | Yes  NCT01193153 | |
| **Study** | | **Study locations** | | **Participants details** | | | **Duration** | | | **Functioning was primary study outcome/Analyses** | | **Industry sponsor/ Trial number** |
| Hough et al., (2010) | | Multi-center: International | | Mean age= 38·8(±11·4) years;  Diagnosis: schizophrenia;  out-patients | | | 24 weeks | | | No  ITT | | Yes  NCT00111189 |
| Isitt et al., (2016) | | Multi-center: US centers | | Mean age=41·2 (±9·27) years; Diagnosis: Schizophrenia;  in-patients | | | 8 weeks | | | No  ITT | | Yes  NCT02109562 |
| Kane et al, (2003)  Kane et al., (2014) | | Multi-center: US centers  Multi-center: International | | Mean age=37.7 (±9.8) years;  Diagnosis: Schizophrenia;  outpatients or inpatients  Mean age=42·1(±11·0) years; Diagnosis= Schizophrenia;  in-patients or out-patients | | | 12 weeks  12 weeks | | | No  ITT  No  ITT | | Yes  Ris-USA-121  Yes  NCT01663532 |
| Koshikawa et al., (2016) | | Single center: Osaka, Japan | | Mean age=46·4(±10·3) years;  Diagnosis: schizophrenia or schizoaffective;  out-patients | | | 26 weeks | | | Yes  ITT | | No  UMIN000014470 |
| Keks et al., (2007) | | Multi-center: International | | Mean age= 32·6(±10·4) years; Diagnosis= Schizophrenia or schizoaffective disorders; in- patients or out-patients | | | 52 weeks | | | No  ITT | | Yes  NCT00236457 |
| Meltzer et al., (2014) | | Multi-center: US centers | | Mean age=41·0(±11·4) years; Diagnosis: schizophrenia or schizoaffective disorder;  in-patients or out-patients | | | 26 weeks | | | No  ITT | | Yes  NCT00539071 |
|  | |  | |  | | |  | | |  | |  |
| **Study** | | **Study Location** | | **Participants details** | | | **Duration** | | | **Functioning was primary study outcome/Analyses** | | **Industry** s**ponsor/ Trial number** |
| Nabar et al., (2015)  NCT00604279 (2013)  NCT00992407  (2014)  Padina et al., (2010)  Padina et al., (2011) | | Multi-center: International  Multi-centre: China  Single Centre: Korea  Multi-center: International  Multi-center: International | | Mean age= 42·6 (±10·9) years;  Diagnosis: Schizophrenia;  in-patients or out-patients  Mean age: 31.7 (±10.88) years;  Diagnosis: Schizophrenia  outpatient  Mean age: 34.5 (±10.00) years  Diagnosis: Schizophrenia or schizoaffective disorders  outpatient  Mean age: 39.3 (±10.55) years  Diagnosis: Schizophrenia  outpatient  Mean age: 38.9 (±11.98) years;  Diagnosis: Schizophrenia  Outpatient or outpatients | | 28 weeks  14 weeks  52 weeks      13weeks  13 weeks | | | Yes  ITT    No  Per-protocol  Yes  Per-protocol  No  ITT  No  ITT | | | Yes  NCT01795547    Yes  NCT00604279  Yes  NCT00992407  Yes  NCT00590577  Yes  NCT00589914 |

| **Study** | | **Study Location** | | **Participants details** | | **Duration** | | **Functioning was primary study**  **Outcome/Analyses** | | **Industry** s**ponsor/ Trial umber** |
| --- | --- | --- | --- | --- | --- | --- | --- | --- | --- | --- |
| Rosenheck et al, (2011) | | Multi-center: US centers | | Mean age=50·9(± 9·3) years; Diagnosis: schizophrenia or schizoaffective disorder; inpatient or outpatient | | 104 weeks | | No  ITT | | Yes  NCT00132314 |
| Rouillon et al., (2013) | | Multi-center: International | | Mean age= 41·6 (±12·8) years; Diagnosis: Schizophrenia or Schizoaffective in-patients or inpatient | | 104 weeks | | No  ITT | | Yes  NCT00216476 |
| Schreiner et al., (2015) | | Multi-center: International | | Mean age= 32·6 (±10·7) years; Diagnosis: Schizophrenia; in-patients | | 104 weeks | | No  ITT | | Yes  NCT01081769 |
| Simpson et al, (2006)  Witte et al., (2012) | Multi-center: International  Multi-center: International | | Mean age= 40·9(±11·0) years Diagnosis: Schizophrenia or Schizoaffective out-patients  Mean age= 40·8 (±11·2) years; Diagnosis: Schizophrenia;  Inpatients or outpatients | | 52 weeks  8 weeks | | No  ITT  No  ITT | | Yes  NCT00297388  Yes  NCT00088478 | |
| Wykes, et al., (2013) | | Multi-center: International | | Mean age: 36·8(±10·8) years;  Diagnosis: Schizophrenia; in-patients or out-patients | | 104 weeks | | No  ITT | | Yes  NCT00256997 |

**Supplementary S3: Risk of Bias of all studies**

**
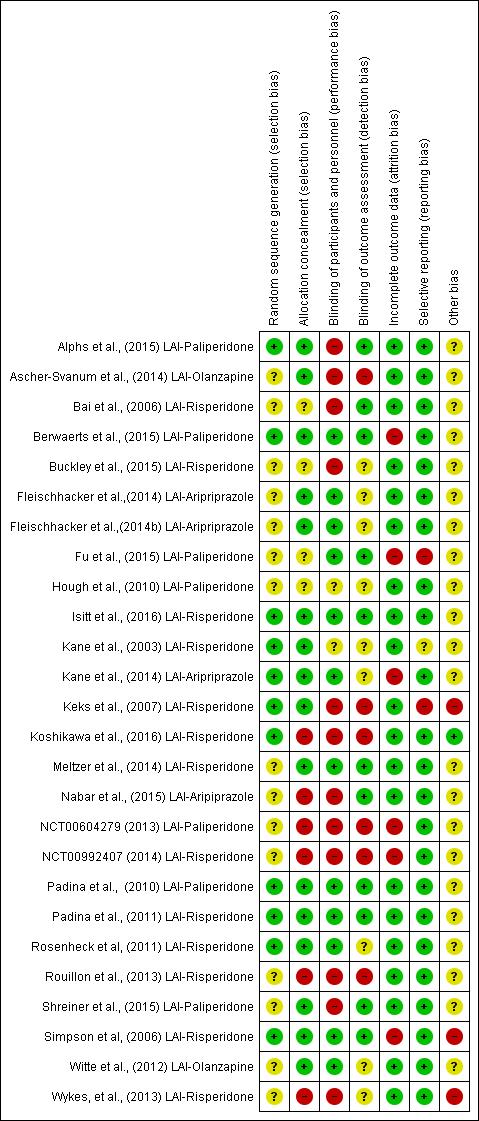
**

**Supplementary S4: Meta-regression of predictors**

| **Study Group**  **(Placebo or Oral)** | **Predictors** | **Comparison** | Coefficient (95% CI) | P value | **Egger’s test** **p-value*** |
| --- | --- | --- | --- | --- | --- |
| All studies |  |  |  |  | 0.790 |
| Oral studies only | Year of publication (continuous) |  | 0.043 (-0.041, 0.126) | 0.274 | 0.873 |
| Oral studies only | Year of publication (binary) | ≥ 2014 versus ≤2014 | 0.078 (-0.325,0.480) | 0.668 |  |
| Oral studies only | Trial duration (continuous) |  | 0.001 (-0.005, 0.007) | 0.702 |  |
| Oral studies only | Study setting | Inpatient versus Outpatient | -0.106 (-0.688, 0.476) | 0.680# |  |
|  |  | Both versus Outpatient | 0.060 (-0.390, 0.510) | 0.761 |  |
| Oral studies only | Functioning as primary outcome | Yes versus No | -0.202 (-0.827, 0.423) | 0.477 |  |
| Oral studies only | Industry sponsorship | Yes versus No | -0.301 (-0.864, 0.263) | 0.254 |  |
| Oral studies only | Study design | Blinded versus Open-label | -0.219 (-0.598,0.161) | 0.220 |  |
| Oral studies only | Length of trial | Long versus Short | 0.193 (-0.641, 1.027) | 0.608 |  |
| Oral studies only | Baseline CGI-S for LAI-A group |  | 0.031 (-0.130, 0.192) | 0.664 |  |
| Placebo studies only | Year of publication (continuous) |  | 0.002 (-0.026, 0.030) | 0.893 | 0.168 |
| Placebo studies only | Year of publication (binary) | ≥2014 versus ≤2014 | -0.049 (-0.235, 0.137) | 0.554 |  |
| Placebo studies only | Trial duration (continuous) |  | -0.0001 (-0.005, 0.003) | 0.711 |  |
| Placebo studies only | Study setting | Inpatient versus Outpatient | -0.164 (-0.516, 0.188) | 0.298## |  |
| Placebo studies only |  | Both versus Outpatient | -0.053 (-0.254, 0.148) | 0.545 |  |
| Placebo studies only | Functioning as primary outcome | All |  |  |  |
| Placebo studies only | Industry sponsorship | All |  |  |  |
| Placebo studies only | Study design | All double-blind |  |  |  |
| Placebo studies only | Length of trial | Long versus Short | 0.009 (-0.175, 0.193) | 0.908 |  |
| Placebo studies only | Baseline CGI-S for LAI-A group |  | -0.003 (-0.101,0.095) | 0.850 |  |

*Null hypothesis is no in small-study effects; #global p- value==0.8017; ##global P value=0.5376; CGI-S=Clinical global impression-severity; 95% CI= 95% Confidence Interval

**Supplementary S5: Funnel plot for all studies and Egger test**

Egger test for all studies

------------------------------------------------------------------------------

Std_Eff | Coef. Std. Err. t P>|t| [95% Conf. Interval]

-------------+----------------------------------------------------------------

slope | .220656 .1624294 1.36 0.192 -.12204 .5633521

bias | .3945513 1.461057 0.27 0.790 -2.68801 3.477112

----------------------------------------------------------------------------

**Supplementary S6: Funnel plot for placebo-controlled studies and Egger test.**

Egger test for placebo-controlled trials

------------------------------------------------------------------------

Std_Eff | Coef. Std. Err. t P>|t| [95% Conf. Interval]

-------------+----------------------------------------------------------------

slope | .785327 .2575515 3.05 0.019 .1763146 1.394339

bias | -3.390889 2.20685 -1.54 0.168 -8.609261 1.827483

**Supplementary S7: Funnel plot for oral-controlled studies and Egger test.**

Egger test for oral-controlled trials

------------------------------------------------------------------------------

Std_Eff | Coef. Std. Err. t P>|t| [95% Conf. Interval]

-------------+----------------------------------------------------------------

slope | .1938582 .1913737 1.01 0.341 -.2474505 .6351668

bias | -.2954459 1.791686 -0.16 0.873 -4.427082 3.83619

--------------------------------------------------------------------------

**References**

**All reports on included studies based on clinical trial numbers**

**NCT01157351**

Alphs L, Mao L, Lynn Starr H, Benson C. A pragmatic analysis comparing once-monthly paliperidone palmitate versus daily oral antipsychotic treatment in patients with schizophrenia. Schizophr Res. 2016 Feb;170(2-3):259-64. doi: 10.1016/j.schres.2015.12.012. Epub 2015 Dec 29.

Alphs L, Bossie C, Mao L, Lee E, Starr HL. Treatment effect with paliperidone palmitate compared with oral antipsychotics in patients with recent-onset versus more chronic schizophrenia and a history of criminal justice system involvement. Early Interv Psychiatry. 2018 Feb;12(1):55-65. doi: 10.1111/eip.12271. Epub 2015 Sep 25.

Alphs L, Benson C, Cheshire-Kinney K, Lindenmayer JP, Mao L, Rodriguez SC, Starr HL. Real-world outcomes of paliperidone palmitate compared to daily oral antipsychotic therapy in schizophrenia: a randomized, open-label, review board-blinded 15-month study. J Clin Psychiatry. 2015 May;76(5):554-61. doi: 10.4088/JCP.14m09584.

Alphs L, Mao L, Rodriguez SC, Hulihan J, Starr HL. Design and rationale of the Paliperidone Palmitate Research in Demonstrating Effectiveness (PRIDE) study: a novel comparative trial of once-monthly paliperidone palmitate versus daily oral antipsychotic treatment for delaying time to treatment failure in persons with schizophrenia. J Clin Psychiatry. 2014 Dec;75(12):1388-93. doi: 10.4088/JCP.13m08965**.**

**NCT00320489**

Ascher-Svanum, H., Novick, D., Haro, J. M., Bertsch, J., McDonnell, D., & Detke, H. (2014). Long-term functional improvements in the 2-year treatment of schizophrenia outpatients with olanzapine long-acting injection. Neuropsychiatr Dis Treat, 10, 1125-1131. doi: 10.2147/ndt.s61409

Atkins S, Detke HC, McDonnell DP, Case MG, Wang S. A pooled analysis of injection site-related adverse events in patients with schizophrenia treated with olanzapine long-acting injection. BMC Psychiatry. 2014 Jan 14;14:7. doi: 10.1186/1471-244X-14-7.

Peuskens J, Porsdal V, Pecenak J, Handest P, D'yachkova Y, Brousil R, Deberdt W. Schizophrenia symptoms and functioning in patients receiving long-term treatment with olanzapine long-acting injection formulation: a pooled analysis. BMC Psychiatry. 2012 Aug 31;12:130. doi: 10.1186/1471-244X-12-130.

McDonnell DP, Detke HC, Bergstrom RF, Kothare P, Johnson J, Stickelmeyer M, Sanchez-Felix MV, Sorsaburu S, Mitchell MI. Post-injection delirium/sedation syndrome in patients with schizophrenia treated with olanzapine long-acting injection, II: investigations of mechanism. BMC Psychiatry. 2010 Jun 10;10:45. doi: 10.1186/1471-244X-10-45.

Detke HC, McDonnell DP, Brunner E, Zhao F, Sorsaburu S, Stefaniak VJ, Corya SA. Post-injection delirium/sedation syndrome in patients with schizophrenia treated with olanzapine long-acting injection, I: analysis of cases. BMC Psychiatry. 2010 Jun 10;10:43. doi: 10.1186/1471-244X-10-43.

**NCS932314B480002**

Bai 2006 {published data only} Bai YM, Chen TT, Wu B, Hung CH, Lin WK, Hu TM, et al. A comparative efficacy and safety study of long-acting risperidone injection and risperidone oral tablets among hospitalized patients: 12-week randomized, single-blind study. Pharmacopsychiatry 2006;39(4):135–

**NCT01529515**

Berwaerts J, Liu Y, Gopal S, Nuamah I, Xu H, Savitz A, Coppola D, Schotte A, Remmerie B, Maruta N, Hough DW. Efficacy and Safety of the 3-Month Formulation of Paliperidone Palmitate vs Placebo for Relapse Prevention of Schizophrenia: A Randomized Clinical Trial. JAMA Psychiatry. 2015 Aug;72(8):830-9. doi: 10.1001/jamapsychiatry.2015.0241.

Weiden PJ, Kim E, Bermak J, Turkoz I, Gopal S, Berwaerts J. Does Half-Life Matter After Antipsychotic Discontinuation? A Relapse Comparison in Schizophrenia With 3 Different Formulations of Paliperidone. J Clin Psychiatry. 2017 Jul;78(7):e813-e820. doi: 10.4088/JCP.16m11308.

Magnusson MO, Samtani MN, Plan EL, Jonsson EN, Rossenu S, Vermeulen A, Russu A. Population Pharmacokinetics of a Novel Once-Every 3 Months Intramuscular Formulation of Paliperidone Palmitate in Patients with Schizophrenia. Clin Pharmacokinet. 2017 Apr;56(4):421-433. doi: 10.1007/s40262-016-0459-3.

Gopal S, Vermeulen A, Nandy P, Ravenstijn P, Nuamah I, Buron Vidal JA, Berwaerts J, Savitz A, Hough D, Samtani MN. Practical guidance for dosing and switching from paliperidone palmitate 1 monthly to 3 monthly formulation in schizophrenia. Curr Med Res Opin. 2015 Nov;31(11):2043-54. doi: 10.1185/03007995.2015.1085849. Epub 2015 Oct 2.

**NCT00330863**

Buckley PF, Schooler NR, Goff DC, Hsiao J, Kopelowicz A, Lauriello J, Manschreck T, Mendelowitz AJ, Miller del D, Severe JB, Wilson DR, Ames D, Bustillo J, Mintz J, Kane JM; PROACTIVE Study. Comparison of SGA oral medications and a long-acting injectable SGA: the PROACTIVE study. Schizophr Bull. 2015 Mar;41(2):449-59. doi: 10.1093/schbul/sbu067. Epub 2014 May 27.

**NCT00705783 &** **NCT00706654**

Fleischhacker WW, Baker RA, Eramo A, et al. (2014) Effects of aripiprazole once-monthly on domains of personal and social performance: results from 2 multicenter, randomized, double-blind studies. Schizophr Res, 159(2-3), 415-420

Kane JM, Sanchez R, Perry PP, Jin N, Johnson BR, Forbes RA, McQuade RD, Carson WH, Fleischhacker WW. Aripiprazole intramuscular depot as maintenance treatment in patients with schizophrenia: a 52-week, multicenter, randomized, double-blind, placebo-controlled study. J Clin Psychiatry. 2012 May;73(5):617-24. doi: 10.4088/JCP.11m07530.

Kane JM, Sanchez R, Baker RA, Eramo A, Peters-Strickland T, Perry PP, Johnson BR, Tsai LF, Carson WH, McQuade RD, Fleischhacker WW. Patient-Centered Outcomes with Aripiprazole Once-Monthly for Maintenance Treatment in Patients with Schizophrenia: Results From Two Multicenter, Randomized, Double-Blind Studies. Clin Schizophr Relat Psychoses. 2015 Summer;9(2):79-87. doi: 10.3371/CSRP.KASA.022015. Epub 2015 Feb 24.

Fleischhacker WW, Sanchez R, Johnson B, Jin N, Forbes RA, McQuade R, Baker RA, Carson W, Kane JM. Long-term safety and tolerability of aripiprazole once-monthly in maintenance treatment of patients with schizophrenia. Int Clin Psychopharmacol. 2013 Jul;28(4):171-6. doi: 10.1097/YIC.0b013e3283615dba.

**NCT01193153**

Fu DJ, Turkoz I, Simonson RB, Walling DP, Schooler NR, Lindenmayer JP, Canuso CM, Alphs L. Paliperidone palmitate once-monthly reduces risk of relapse of psychotic, depressive, and manic symptoms and maintains functioning in a double-blind, randomized study of schizoaffective disorder. J Clin Psychiatry. 2015 Mar;76(3):253-62. doi: 10.4088/JCP.14m09416.

Alphs L, Fu DJ, Turkoz I. Paliperidone for the treatment of schizoaffective disorder. Expert Opin Pharmacother. 2016;17(6):871-83. doi: 10.1517/14656566.2016.1161029. Epub 2016 Mar 24. Review.

**NCT00111189**

Hough D, Gopal S, Vijapurkar U, Lim P, Morozova M, Eerdekens M. Paliperidone palmitate maintenance treatment in delaying the time-to-relapse in patients with schizophrenia: a randomized, double-blind, placebo-controlled study. Schizophr Res. 2010 Feb;116(2-3):107-17. doi: 10.1016/j.schres.2009.10.026. Epub 2009 Dec 2.

Weiden PJ, Kim E, Bermak J, Turkoz I, Gopal S, Berwaerts J. Does Half-Life Matter After Antipsychotic Discontinuation? A Relapse Comparison in Schizophrenia With 3 Different Formulations of Paliperidone. J Clin Psychiatry. 2017 Jul;78(7):e813-e820. doi: 10.4088/JCP.16m11308.

Kozma CM, Slaton T, Dirani R, Fastenau J, Gopal S, Hough D. Changes in schizophrenia-related hospitalization and ER use among patients receiving paliperidone palmitate: results from a clinical trial with a 52-week open-label extension (OLE). Curr Med Res Opin. 2011 Aug;27(8):1603-11. doi: 10.1185/03007995.2011.595000. Epub 2011 Jun 22.

**NCT02109562**

Isitt, J. J., Nadipelli, V. R., Kouassi, A., Fava, M., & Heidbreder, C. (2016). Health-related quality of life in acute schizophrenia patients treated with RBP-7000 once monthly risperidone: An 8-week, randomized, double-blind, placebo-controlled, multicenter phase 3 study. Schizophr Res, 174(1-3), 126-131. doi: 10.1016/j.schres.2016.03.020

**Ris-USA-121**

Kane JM, Eerdekens M, Lindenmayer JP, Keith SJ, Lesem M, Karcher K. Long-acting injectable risperidone: efficacy and safety of the first long-acting atypical antipsychotic. Am J Psychiatry 2003; 160(6): 1125-32.

**NCT01663532**

Kane JM, Peters-Strickland T, Baker RA, Hertel P, Eramo A, Jin N, Perry PP, Gara M, McQuade RD, Carson WH, Sanchez R. Aripiprazole once-monthly in the acute treatment of schizophrenia: findings from a 12-week, randomized, double-blind, placebo-controlled study. J Clin Psychiatry. 2014 Nov;75(11):1254-60. doi: 10.4088/JCP.14m09168.

**UMIN000014470**

Koshikawa, Y., Takekita, Y., Kato, M., Sakai, S., Onohara, A., Sunada, N., . . . Kinoshita, T. (2016). The Comparative Effects of Risperidone Long-Acting Injection and Paliperidone Palmitate on Social Functioning in Schizophrenia: A 6-Month, Open-Label, Randomized Controlled Pilot Trial. Neuropsychobiology, 73(1), 35-42. doi: 10.1159/000442209

**NCT00236457**

Keks, N. A., Ingham, M., Khan, A., & Karcher, K. (2007). Long-acting injectable risperidone v. olanzapine tablets for schizophrenia or schizoaffective disorder. Randomised, controlled, open-label study. Br J Psychiatry, 191, 131-139. doi: 10.1192/bjp.bp.105.017020

**NCT00539071**

Meltzer, H. Y., Lindenmayer, J. P., Kwentus, J., Share, D. B., Johnson, R., & Jayathilake, K. (2014). A six month randomized controlled trial of long acting injectable risperidone 50 and 100mg in treatment resistant schizophrenia. Schizophr Res, 154(1-3), 14-22. doi: 10.1016/j.schres.2014.02.015

**NCT01795547**

Naber D, Hansen K, Forray C, Baker RA, Sapin C, Beillat M, Peters-Strickland T, Nylander AG, Hertel P, Andersen HS, Eramo A, Loze JY, Potkin SG. Qualify: a randomized head-to-head study of aripiprazole once-monthly and paliperidone palmitate in the treatment of schizophrenia. Schizophr Res. 2015 Oct;168(1-2):498-504. doi: 10.1016/j.schres.2015.07.007. Epub 2015 Jul 29.

Potkin SG, Loze JY, Forray C, Baker RA, Sapin C, Peters-Strickland T, Beillat M, Nylander AG, Hertel P, Nitschky Schmidt S, Eramo A, Hansen K, Naber D. Multidimensional Assessment of Functional Outcomes in Schizophrenia: Results From QUALIFY, a Head-to-Head Trial of Aripiprazole Once-Monthly and Paliperidone Palmitate. Int J Neuropsychopharmacol. 2017 Jan 1;20(1):40-49. doi: 10.1093/ijnp/pyw093.

**NCT00604279**

nr

**NCT00992407**

Nr

**NCT00590577**

Pandina GJ, Lindenmayer JP, Lull J, Lim P, Gopal S, Herben V, Kusumakar V, Yuen E, Palumbo J. A randomized, placebo-controlled study to assess the efficacy and safety of 3 doses of paliperidone palmitate in adults with acutely exacerbated schizophrenia. J Clin Psychopharmacol. 2010 Jun;30(3):235-44. doi: 10.1097/JCP.0b013e3181dd3103. Erratum in: J Clin Psychopharmacol. 2010 Aug;30(4):364.

Alphs L, Bossie CA, Fu DJ, Ma YW, Kern Sliwa J. Onset and persistence of efficacy by symptom domain with long-acting injectable paliperidone palmitate in patients with schizophrenia. Expert Opin Pharmacother. 2014 May;15(7):1029-42. doi: 10.1517/14656566.2014.909409.

Bossie CA, Sliwa JK, Ma YW, Fu DJ, Alphs L. Onset of efficacy and tolerability following the initiation dosing of long-acting paliperidone palmitate: post-hoc analyses of a randomized, double-blind clinical trial. BMC Psychiatry. 2011 May 10;11:79. doi: 10.1186/1471-244X-11-79.

Alphs L, Bossie CA, Sliwa JK, Ma YW, Turner N. Onset of efficacy with acute long-acting injectable paliperidone palmitate treatment in markedly to severely ill patients with schizophrenia: post hoc analysis of a randomized, double-blind clinical trial. Ann Gen Psychiatry. 2011 Apr 11;10(1):12. doi: 10.1186/1744-859X-10-12.

**NCT00589914**

Pandina G, Lane R, Gopal S, Gassmann-Mayer C, Hough D, Remmerie B, Simpson G. A double-blind study of paliperidone palmitate and risperidone long-acting injectable in adults with schizophrenia. Prog Neuropsychopharmacol Biol Psychiatry. 2011 Jan 15;35(1):218-26. doi: 10.1016/j.pnpbp.2010.11.008. Epub 2010 Nov 16.

Alphs L, Bossie CA, Fu DJ, Ma YW, Kern Sliwa J. Onset and persistence of efficacy by symptom domain with long-acting injectable paliperidone palmitate in patients with schizophrenia. Expert Opin Pharmacother. 2014 May;15(7):1029-42. doi: 10.1517/14656566.2014.909409.

Fu DJ, Bossie CA, Sliwa JK, Ma YW, Alphs L. Paliperidone palmitate versus oral risperidone and risperidone long-acting injection in patients with recently diagnosed schizophrenia: a tolerability and efficacy comparison. Int Clin Psychopharmacol. 2014 Jan;29(1):45-55. doi: 10.1097/YIC.0000000000000006.

Fu DJ, Bossie CA, Kern Sliwa J, Ma YW, Alphs L. Paliperidone palmitate versus risperidone long-acting injection in markedly-to-severely ill schizophrenia subjects: onset of efficacy with recommended initiation regimens. Clin Schizophr Relat Psychoses. 2014 Jul;8(2):101-9, 109A. doi: 10.3371/CSRP.FUBO.022213.

**NCT00132314**

Rosenheck RA, Krystal JH, Lew R, Barnett PG, Thwin SS, Fiore L, Valley D, Huang GD, Neal C, Vertrees JE, Liang MH; CSP 555 Research Group. Challenges in the design and conduct of controlled clinical effectiveness trials in schizophrenia. Clin Trials. 2011 Apr;8(2):196-204. doi: 10.1177/1740774510392931. Epub 2011 Jan 26.

Rosenheck RA, Krystal JH, Lew R, Barnett PG, Fiore L, Valley D, Thwin SS, Vertrees JE, Liang MH; CSP555 Research Group. Long-acting risperidone and oral antipsychotics in unstable schizophrenia. N Engl J Med. 2011 Mar 3;364(9):842-51. doi: 10.1056/NEJMoa1005987. Erratum in: N Engl J Med. 2011 Mar 31;364(13):1281.

Barnett PG, Scott JY, Rosenheck RA; CSP 555 Study Group. How do clinical trial participants compare to other patients with schizophrenia? Schizophr Res. 2011 Aug;130(1-3):34-9. doi: 10.1016/j.schres.2011.03.033. Epub 2011 Apr 22.

Barnett PG, Scott JY, Krystal JH, Rosenheck RA; CSP 555 Research Group. Cost and cost-effectiveness in a randomized trial of long-acting risperidone for schizophrenia. J Clin Psychiatry. 2012 May;73(5):696-702. doi: 10.4088/JCP.11m07070.

Thwin SS, Hermes E, Lew R, Barnett P, Liang M, Valley D, Rosenheck R. Assessment of the minimum clinically important difference in quality of life in schizophrenia measured by the Quality of Well-Being Scale and disease-specific measures. Psychiatry Res. 2013 Oct 30;209(3):291-6. doi: 10.1016/j.psychres.2013.01.016. Epub 2013 Mar 7.

Hoblyn JC, Rosenheck RA, Leatherman S, Weil L, Lew R; CSP 555 Investigator Group. Veteran subjects willingness to participate in schizophrenia clinical trials. Psychiatr Q. 2013 Jun;84(2):209-18. doi: 10.1007/s11126-012-9240-4.

**NCT00216476**

Rouillon, F., Eriksson, L., Burba, B., Raboch, J., Kaprinis, G., & Schreiner, A. (2013). Functional recovery results from the risperidone long-acting injectable versus quetiapine relapse prevention trial (ConstaTRE). Acta Neuropsychiatr, 25(5), 297-306. doi: 10.1017/neu.2013.7

**NCT01081769**

Schreiner A, Aadamsoo K, Altamura AC, Franco M, Gorwood P, Neznanov NG, Schronen J, Ucok A, Zink M, Janik A, Cherubin P, Lahaye M, Hargarter L. Paliperidone palmitate versus oral antipsychotics in recently diagnosed schizophrenia. Schizophr Res. 2015 Dec;169(1-3):393-399. doi: 10.1016/j.schres.2015.08.015.

**NCT00297388**

Simpson GM, Mahmoud RA, Lasser RA, Kujawa M, Bossie CA, Turkoz I, Rodriguez S, Gharabawi GM. A 1-year double-blind study of 2 doses of long-acting risperidone in stable patients with schizophrenia or schizoaffective disorder. J Clin Psychiatry. 2006 Aug;67(8):1194-203.

**NCT00088478**

Witte MM, Case MG, Schuh KJ, Ascher-Svanum H. Effects of olanzapine long-acting injection on levels of functioning among acutely ill patients with schizophrenia. Curr Med Res Opin. 2012 Mar;28(3):315-23. doi: 10.1185/03007995.2012.657300. Epub 2012 Jan 31.Atkins S, Detke HC, McDonnell DP, Case MG, Wang S. A pooled analysis of injection site-related adverse events in patients with schizophrenia treated with olanzapine long-acting injection. BMC Psychiatry. 2014 Jan 14;14:7. doi: 10.1186/1471-244X-14-7.

Detke HC, Zhao F, Witte MM. Efficacy of olanzapine long-acting injection in patients with acutely exacerbated schizophrenia: an insight from effect size comparison with historical oral data. BMC Psychiatry. 2012 May 30;12:51. doi: 10.1186/1471-244X-12-51.

Ascher-Svanum H, Zhao F, Detke HC, Nyhuis AW, Lawson AH, Stauffer VL, Montgomery W, Witte MM, McDonnell DP. Early response predicts subsequent response to olanzapine long-acting injection in a randomized, double-blind clinical trial of treatment for schizophrenia. BMC Psychiatry. 2011 Sep 23;11:152. doi: 10.1186/1471-244X-11-152.

McDonnell DP, Detke HC, Bergstrom RF, Kothare P, Johnson J, Stickelmeyer M, Sanchez-Felix MV, Sorsaburu S, Mitchell MI. Post-injection delirium/sedation syndrome in patients with schizophrenia treated with olanzapine long-acting injection, II: investigations of mechanism. BMC Psychiatry. 2010 Jun 10;10:45. doi: 10.1186/1471-244X-10-45.

Detke HC, McDonnell DP, Brunner E, Zhao F, Sorsaburu S, Stefaniak VJ, Corya SA. Post-injection delirium/sedation syndrome in patients with schizophrenia treated with olanzapine long-acting injection, I: analysis of cases. BMC Psychiatry. 2010 Jun 10;10:43. doi: 10.1186/1471-244X-10-43.

Lauriello J, Lambert T, Andersen S, Lin D, Taylor CC, McDonnell D. An 8-week, double-blind, randomized, placebo-controlled study of olanzapine long-acting injection in acutely ill patients with schizophrenia. J Clin Psychiatry. 2008 May;69(5):790-9. Erratum in: J Clin Psychiatry. 2011 Aug;72(8):1157.

**NCT00256997**

Wykes, T., Rose, D., Williams, P., & David, A. S. (2013). Working alliance and its relationship to outcomes in a randomized controlled trial (RCT) of antipsychotic medication. BMC Psychiatry, 13, 28. doi: 10.1186/1471-244x-13-28
